# Supplementary material for: Asymmetric living supramolecular polymerization of an achiral aza-BODIPY dye by solvent-mediated chirality induction and memory
Source: Royal Society of Chemistry journal article supplement (doi:10.1039/d2qo00623e), 2022-01-01
Supplement: d2qo00623e1.pdf [file d2qo00623e1.pdf]

## Electronic Supplementary Material

### **Asymmetric living supramolecular polymerization of an achiral aza-BODIPY dye by solvent-mediated chirality induction and memory**

Jiahui Ding, Hongfei Pan, Houchen Wang, Xiang-Kui Ren, Zhijian Chen\*

*School of Chemical Engineering and Technology, The National Collaborative  
Innovation Centre of Chemical Science and Engineering (Tianjin), Tianjin University,  
Tianjin 300072, China*

Email: [zjchen@tju.edu.cn](mailto:zjchen@tju.edu.cn)

## Table of Contents

|                                                                                                                   |    |
|-------------------------------------------------------------------------------------------------------------------|----|
| 1. Materials and Methods.....                                                                                     | 3  |
| 2. Data analysis for temperature-dependent spectroscopic studies.....                                             | 5  |
| 3. Aggregation studies by spectroscopic methods and AFM.....                                                      | 6  |
| 4. Studies on the seeded supramolecular polymerization in MCH/limonene mixture and the racemization process ..... | 12 |
| 5. References.....                                                                                                | 14 |

## 1. Materials and Methods

**Chemicals and Reagents:** Unless otherwise specified, all the chemicals were purchased from commercial suppliers and did not require further purification when used.

Aza-BODIPY dye **1** was synthesized as described previously.<sup>1</sup>

**UV/Vis spectroscopy:** UV/Vis absorption spectra were recorded on an Agilent Technologies Cary 300 UV/Vis spectrophotometer equipped with a SPV 1×1 temperature controller. The solvents for spectroscopic studies were spectroscopic grade and used as received. The spectra were recorded in quartz cuvettes and the extinction coefficients  $\epsilon$  was calculated according to Lambert-Beer's law.

**Circular dichroism (CD) spectroscopy:** CD spectra were recorded on a Jasco J-810 spectrophotometer equipped with Jasco CDF 426S temperature controller.

**Atomic force microscopy:** AFM measurements were performed under ambient conditions using a Bruker Dimension icon spectra system operating in tapping mode. Silicon cantilevers with a resonance frequency of 300 kHz were used. The sample for AFM was prepared by drop-casting (*S*)- and (*R*)-limonene solution of dye **1** ( $c=1.0 \times 10^{-5}$  M) on mica surface and evaporating the solvent.

**Transmission electron microscopy:** Transmission electron microscopy (TEM) measurements were performed on a JEM-1400 transmission electron microscope, operating at an acceleration voltage of 120 kV. For the observation of aggregates, 400-mesh copper grids coated with carbon was dipped in a drop of sample solution of dye **1**. About 1 min after the deposition, the grid was placed on filter paper to remove solvent. Staining was performed by a drop of uranyl acetate aqueous solution (0.5 % wt) onto the copper grid. After 10 min, the liquid on the grid was removed with filter paper.

**Fourier transform infrared (FT-IR) Spectroscopy:** FT-IR measurements were performed on a Bruker ALPHA II infrared spectrometer. The liquid sample was prepared by holding appropriate amount of solution of dye **1** between two KBr crystal tablets. Press it into a uniform and transparent film with tablet press.

**Preparation of the Aggregates II<sub>L</sub>:** Aza-BODIPY dye **1** (1.0 - 4.0 mg) was dissolved with 100 mL either (*S*)-limonene or (*R*)-limonene. By keeping the solutions at room

temperature for 8 to 20 h, **Agg. II<sub>L</sub>** of dye **1** in (*S*)- and (*R*)-limonene was obtained. The formation of **Agg. II<sub>L</sub>** was confirmed by UV/Vis absorption spectra.

**Preparation of the Aggregates I<sub>M</sub>:** Aza-BODIPY dye **1** (1.0 - 4.0 mg) was dissolved with 100 mL MCH. By keeping the solutions at room temperature for 8 to 20 h, **Agg. II<sub>M</sub>** of dye **1** in MCH was obtained. Then the solution was cooled rapidly at the rate of 10 K/min so that the **Agg. I<sub>M</sub>** was obtained. The formation of **Agg. I<sub>M</sub>** was confirmed by UV/Vis absorption spectra.

**Experimental operation for multiple cyclic Living supramolecular polymerization:**

Firstly, the seeds of **Agg. II<sub>L</sub>** (**Seed<sub>Agg. II<sub>L</sub></sub>**) was prepared by applying sonication to a **Agg. II<sub>L</sub>** solution in (*S*)-limonene ( $c_T = 5.0 \times 10^{-6}$  M) for 5 min in a water bath at 293 K. And the freshly prepared **Agg. I<sub>M</sub>** was obtained by rapid cooling of the hot monomer solution of dye **1** in MCH ( $c_T = 5.0 \times 10^{-6}$  M) from 343 K to 278 K (10 K min<sup>-1</sup>) which was in a kinetically trapped inactive state. Then the equal amounts of **Agg. I<sub>M</sub>** at 278 K (1.5 mL) was injected into **Seed<sub>Agg. II<sub>L</sub></sub>** (1.5 mL) which has already been cooled down to 278 K. After that the mixture was warmed to 283 K to initiate the first cycle of multiple cycles of living polymerization process and kept at this temperature. After the complete transformation from **Agg. I<sub>M</sub>** to **Agg. II<sub>L</sub>**, half volume of the solution was removed and the remaining half was cooled down to 278 K. Then the equal amounts of **Agg. I<sub>M</sub>** in pure MCH at 278 K (1.5 mL) was injected into the remaining solution of the first cycle and the mixture was heated to 283 K again and maintain this temperature until the transformation process was finished. The solution was cooled down to 278 K to prepare for the next cycle and the operation was repeated.

## 2. Data analysis for temperature-dependent spectroscopic studies

For the process of temperature-dependent research, the summation of the fractions of two species is equal to 1 if monomer and aggregate species are involved. The  $\alpha_{\text{mon}}$  and  $\alpha_{\text{agg}}$  represent the fraction of monomer and aggregates. When there were only monomer and one type of aggregate existing in process of temperature-dependent study, the  $\alpha_{\text{agg}}$  could be obtained by the Eq. S1:

$$\alpha_{\text{agg}}(T) = 1 - \frac{\varepsilon(T) - \varepsilon_{\text{agg}}}{\varepsilon_{\text{mon}} - \varepsilon_{\text{agg}}} \quad (\text{S1})$$

For CD spectroscopic data,  $\Delta\varepsilon_{\text{agg}}$  was used instead of  $\varepsilon_{\text{agg}}$  in equation (S1).

The data points of the molar fraction of aggregated molecules obtained in experiment as a function of temperature can be fitted by using the nucleation-elongation model (Eq. S2 and Eq. S3, for the enucleation and elongation regime respectively) proposed by Meijer et al.<sup>2,3</sup> Accordingly, thermodynamic parameters including the dimensionless equilibrium constant  $K_a$  (for the activation step at the elongation temperature), elongation temperature  $T_e$ , and the elongation enthalpy change  $\Delta H_e$ . The average length of the stack  $N_n(T_e)$  at  $T_e$  is given by Eq. S4.

$$\alpha_{\text{agg}} = K_a^{1/3} \exp\left(2/3 K_a^{-1/3} - 1\right) \left[ \frac{\Delta H_e}{RT_e^2} (T - T_e) \right] \quad (\text{S2})$$

$$\alpha_{\text{agg}} = \alpha_{\text{SAT}} \left\{ 1 - \exp \left[ - \frac{\Delta H_e}{RT_e^2} (T - T_e) \right] \right\} \quad (\text{S3})$$

$$N_n(T_e) = \frac{1}{K_a^{1/3}} \quad (\text{S4})$$

The standard enthalpy change ( $\Delta H^\circ$ ) and standard entropy change ( $\Delta S^\circ$ ) can be determined according to the linear relationship in the van't Hoff plot applying Eq. S5, where  $R$  is the ideal gas constant.<sup>4</sup>

$$\ln \left[ \frac{1}{c_T} \right] = - \frac{\Delta H^\circ}{RT_e} + \frac{\Delta S^\circ}{R} \quad (\text{S5})$$

### 3. Aggregation studies by spectroscopic methods and AFM

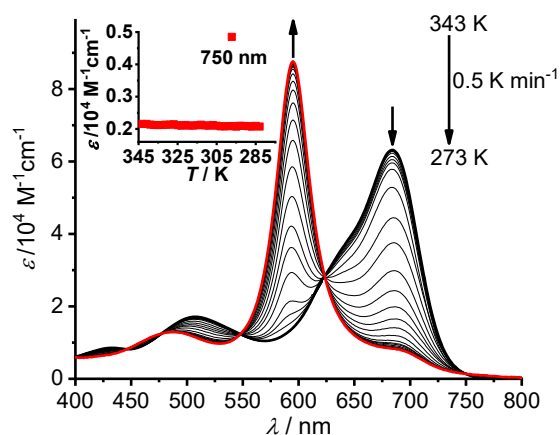

**Fig. S1** Temperature-dependent UV/Vis absorption spectra of dye **1** in (*S*)-limonene ( $c_T = 1.0 \times 10^{-5}$  M) upon cooling from 343 K to 273 K at  $0.5 \text{ K min}^{-1}$ . Inset: Changes of the molar extinction absorption coefficient monitored at 750 nm.

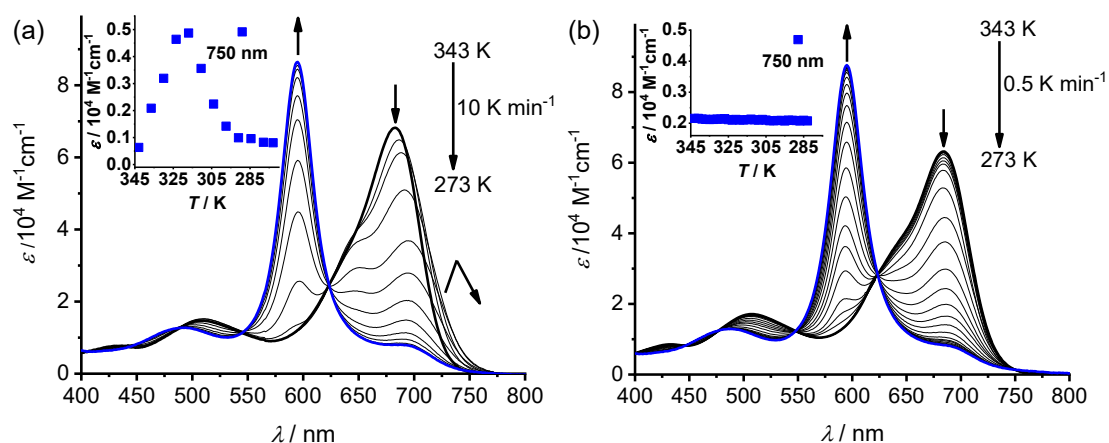

**Fig. S2** Temperature-dependent UV/Vis absorption spectra of dye **1** in (*R*)-limonene ( $c_T = 1.0 \times 10^{-5}$  M) upon (a) rapid cooling at  $10 \text{ K min}^{-1}$  and (b) slow cooling at  $0.5 \text{ K min}^{-1}$  from 343 K to 273 K. Insets: Changes of the molar extinction absorption coefficient monitored at 750 nm.

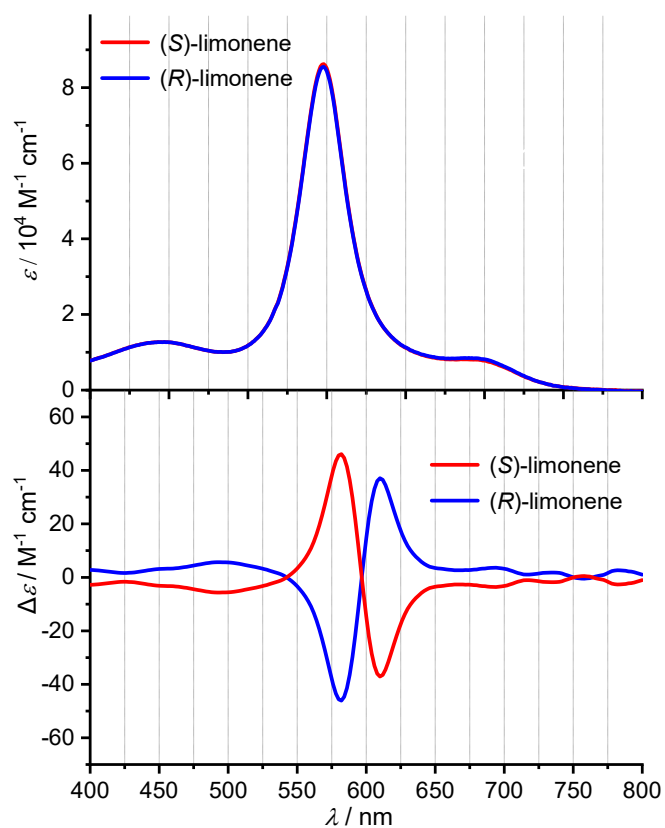

**Fig. S3** UV/Vis absorption spectra (top) and CD (bottom) spectra of dye **1** in (*S*)-limonene ( $1.0 \times 10^{-5}$  M) and (*R*)-limonene ( $1.0 \times 10^{-5}$  M) at 273 K, respectively.

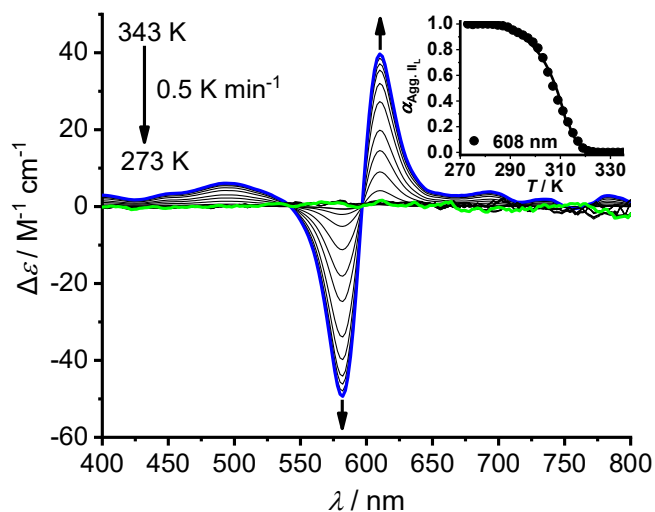

**Fig. S4** Temperature-dependent CD spectra of dye **1** cooling from 343 K to 273 K in (*R*)-limonene ( $1.0 \times 10^{-5}$  M) at  $0.5 \text{ K min}^{-1}$ . Inset: The calculated plot of molar fraction of **Agg. II<sub>L</sub>** versus temperatures (monitored at 608 nm).

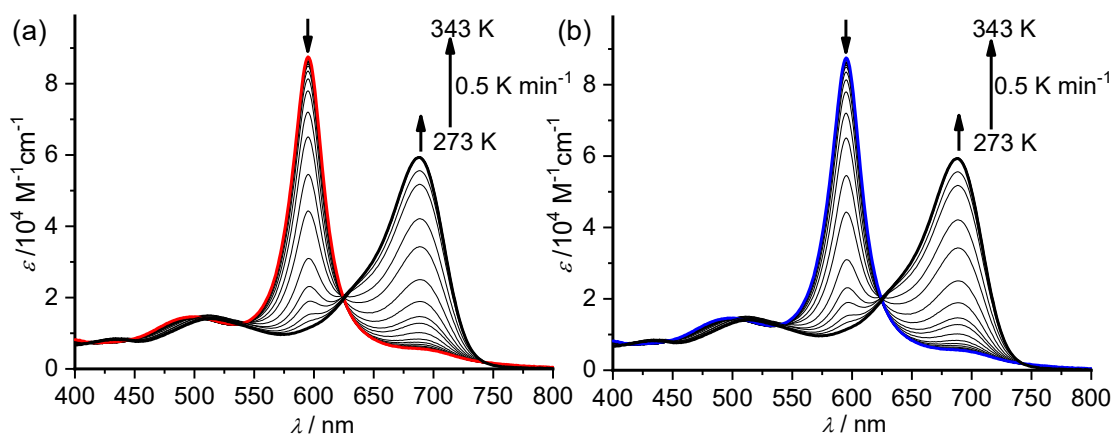

**Fig. S5** Temperature-dependent UV/Vis absorption spectra of dye **1** in (a) (*S*)-limonene ( $c_T = 1.0 \times 10^{-5}$  M) and (b) (*R*)-limonene ( $c_T = 1.0 \times 10^{-5}$  M) upon heating from 273 K to 343 K at  $0.5 \text{ K min}^{-1}$ .

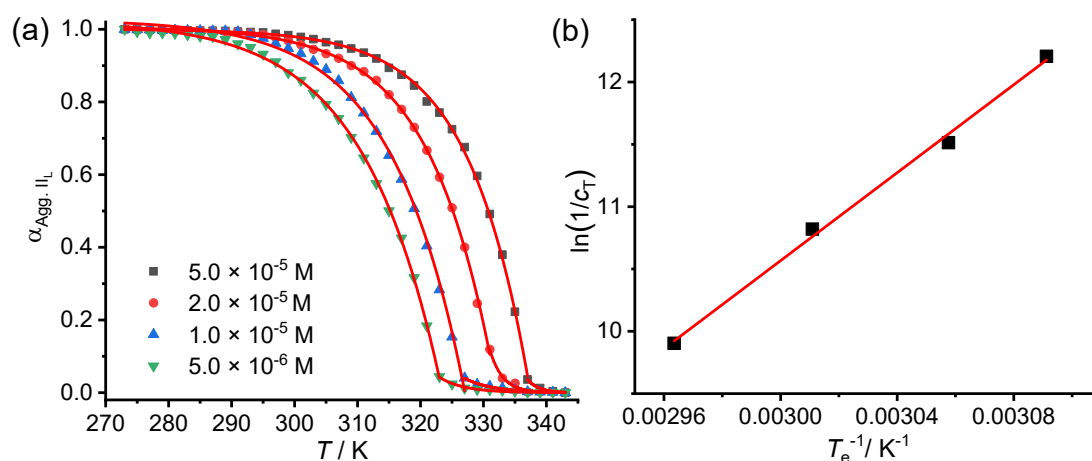

**Fig. S6** (a) Molar fraction of **Agg. II<sub>L</sub>** in (*S*)-limonene monitored by temperature-dependent UV/Vis absorption spectra at 595 nm in the heating process from 273 K to 343 K at the rate of  $0.5 \text{ K min}^{-1}$ . (b) The van't Hoff plot for heating process of **Agg. II<sub>L</sub>** in (*S*)-limonene ( $5.0 \times 10^{-6}$  M to  $5.0 \times 10^{-5}$  M).



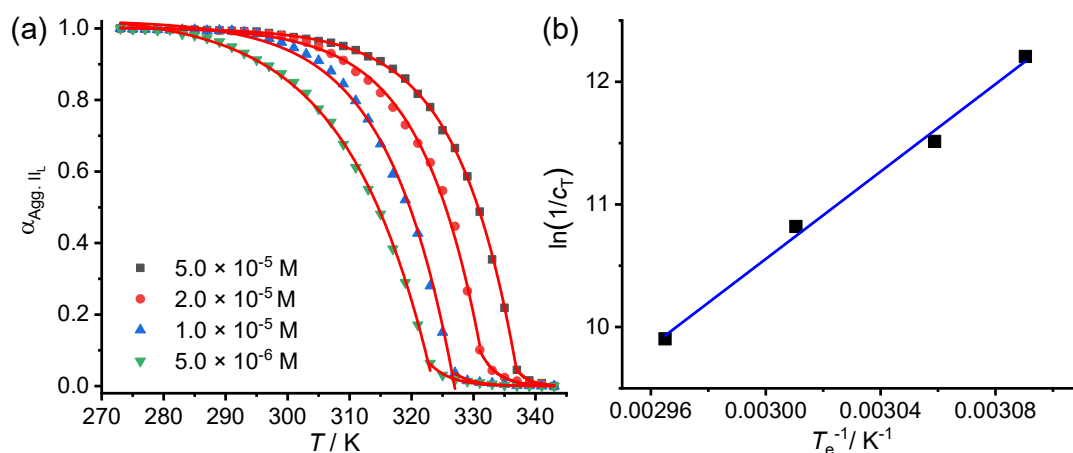

**Fig. S7** (a) Molar fraction of **Agg. II<sub>L</sub>** in (*R*)-limonene monitored by temperature-dependent UV/Vis absorption spectra at 595 nm in the heating process from 273 K to 343 K at the rate of 0.5 K min<sup>-1</sup>. (b) The van't Hoff plot for heating process of **Agg. II<sub>L</sub>** in (*R*)-limonene (5.0 × 10<sup>-6</sup> M to 5.0 × 10<sup>-5</sup> M).

**Table S1** Thermodynamic parameters of aza-BODIPY **1** in chiral limonene solution.

|                         |                         | <i>(S)</i> -Limonene |                         | <i>(R)</i> -Limonene |  |
|-------------------------|-------------------------|----------------------|-------------------------|----------------------|--|
| <i>c</i> <sub>T</sub> / | <i>T</i> <sub>e</sub> / | $\Delta H_e$ /       | <i>T</i> <sub>e</sub> / | $\Delta H_e$ /       |  |
| 10 <sup>-5</sup> M      | K                       | kJ mol <sup>-1</sup> | K                       | kJ mol <sup>-1</sup> |  |
| 0.5                     | 324 ± 0.5               | -173 ± 2.5           | 324 ± 0.6               | -175 ± 1.6           |  |
| 1.0                     | 327 ± 0.3               | -173 ± 2.1           | 327 ± 0.8               | -175 ± 2.8           |  |
| 2.0                     | 332 ± 0.4               | -170 ± 1.8           | 332 ± 0.5               | -172 ± 1.9           |  |
| 5.0                     | 337 ± 0.4               | -174 ± 3.4           | 337 ± 0.6               | -174 ± 2.5           |  |

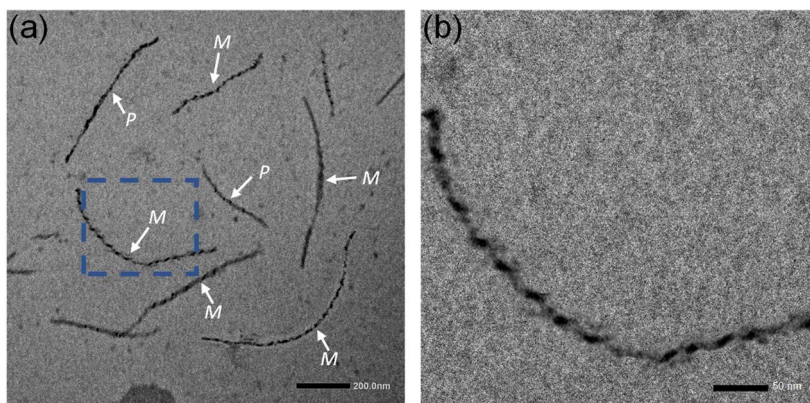

**Fig. S8** (a) TEM image for **Agg. II<sub>L</sub>** in (*S*)-limonene solution ( $1.0 \times 10^{-5}$  M). (b) Zoomed image of one left-handed (*M*) nanofiber along the blue dashed box of (a)

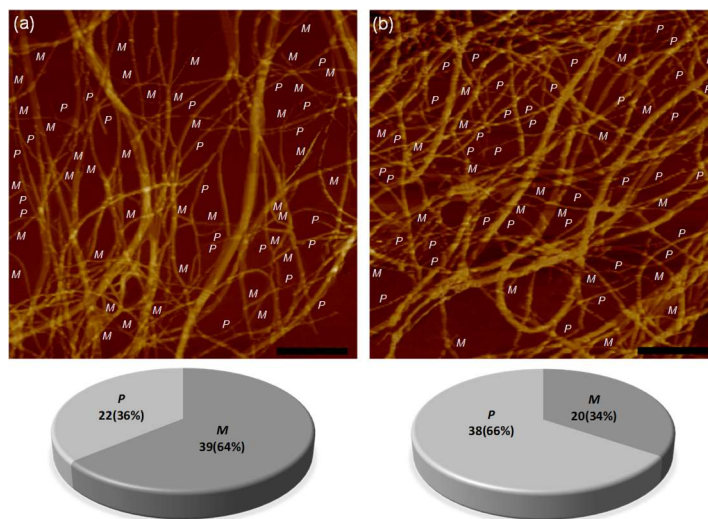

**Fig. S9** AFM height image by drop-casting (a) (*S*)-limonene and (b) (*R*)-limonene solution ( $5.0 \times 10^{-5}$  M) of dye **1** and the statistical graph of *M* and *P* helices.

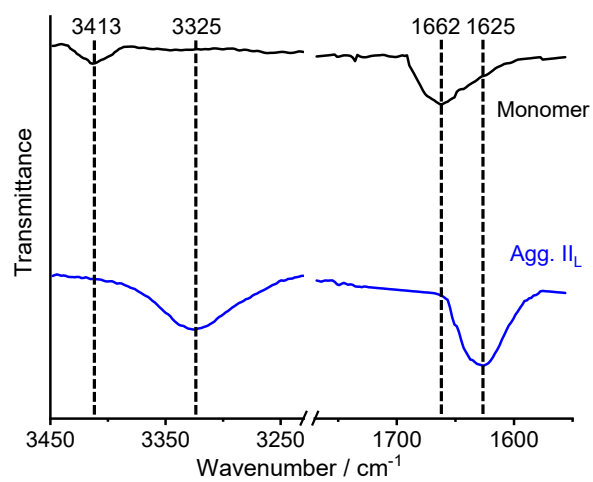

**Fig. S10** FT-IR spectra of the N-H and C=O stretching vibration region for monomeric dye **1** ( $c_T = 1.0 \times 10^{-5}$  M) in CHCl<sub>3</sub>, and **Agg. II<sub>L</sub>** in (*S*)-limonene ( $c_T = 1.0 \times 10^{-5}$  M).

#### 4. Studies on the seeded supramolecular polymerization in MCH/limonene mixture and the racemization process

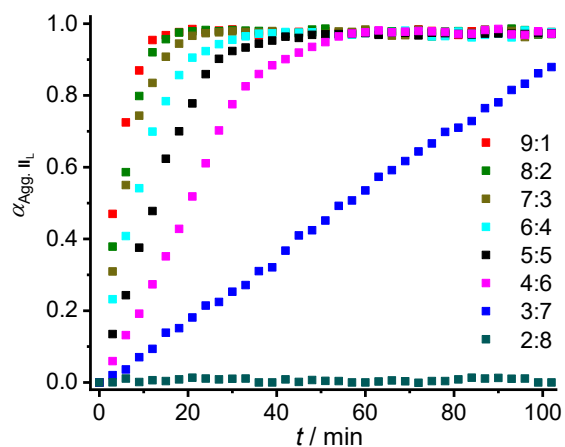

**Fig. S11** The kinetic curves for the transformation of **Agg. I<sub>M</sub>** to **Agg. I<sub>L</sub>** monitored by CD spectroscopy at 283 K in the mixed solvent of (*S*)-limonene/MCH ( $c_T = 5.0 \times 10^{-6}$  M) from 9:1 to 2:8.

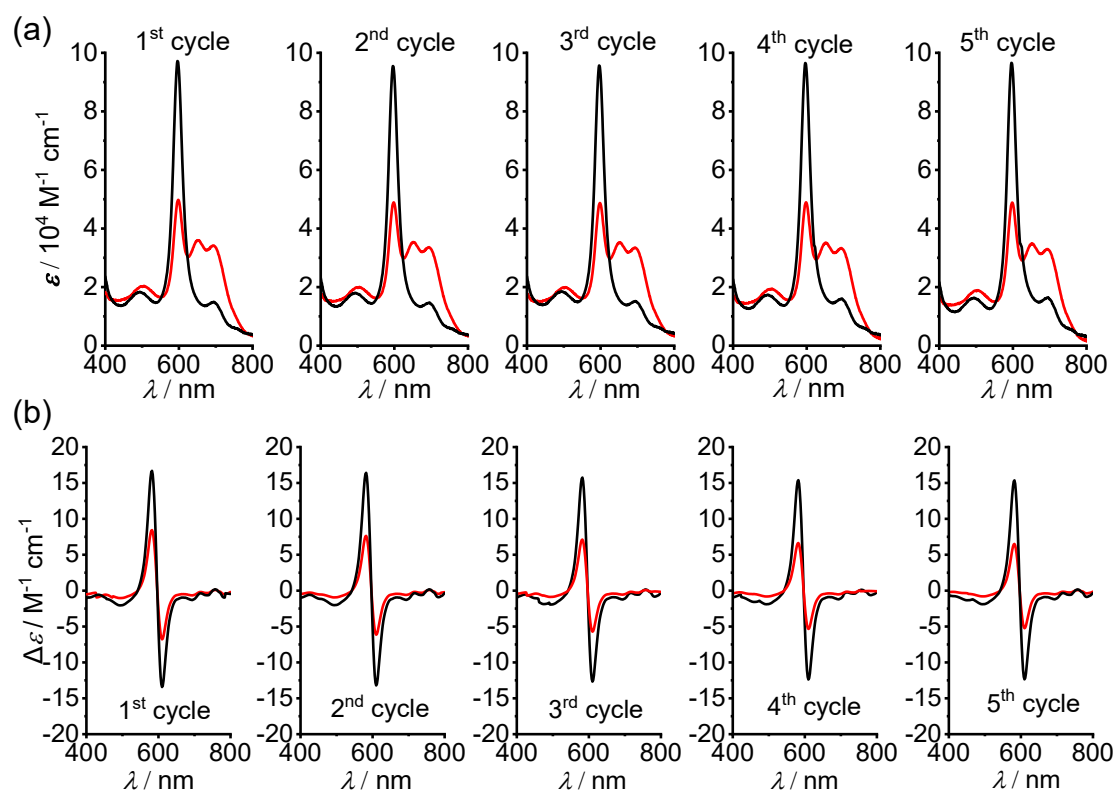

**Fig. S12** The initial (red) and final (black) UV/Vis absorption spectra (a) and CD spectra (b) for each cycle of the LSP process in MCH/limonene ( $[\text{Seed}_{\text{Agg. III}} \text{ in } (S)\text{-limonene}] = [\text{Agg. I}_{\text{M}} \text{ in MCH}] = 5.0 \times 10^{-6} \text{ M}$ ).

## 5. References

- 1 H. Wang, Y. Zhang, Y. Chen, H. Pan, X. Ren and Z. Chen, Living Supramolecular Polymerization of an Aza-BODIPY Dye Controlled by a Hydrogen-Bond-Accepting Triazole Unit Introduced by Click Chemistry, *Angew. Chem. Int. Ed.*, 2020, **59**, 5185-5192.
- 2 P. Jonkheijm, P. van der Schoot, A. P. H. J. Schenning and E. W. Meijer, Probing the solvent-assisted nucleation pathway in chemical self-assembly, *Science*, 2006, **313**, 80-83.
- 3 G. Fernández, M. Stolte, V. Stepanenko and F. Würthner, Cooperative Supramolecular Polymerization: Comparison of Different Models Applied on the Self-Assembly of Bis(merocyanine) Dyes, *Chem.-Eur. J.*, 2013, **19**, 206-217.
- 4 P. A. Korevaar, S. J. George, A. J. Markvoort, M. M. J. Smulders and E. W. Meijer, Pathway complexity in supramolecular polymerization, *Nature*, 2012, **481**, 492-496.
